# Supplementary material for: Electrical Stimulation for Wound-Healing: Simulation on the Effect of Electrode Configurations
Source: Hindawi journal article supplement (doi:10.1155/2017/5289041), 2017-01-01

## Supplementary Material

The Supplementary Material including 1 supplementary figure is as follows.

Supplementary Figure S1: 1D EF distribution combining the endogenous EF with the applied EF in A. Geo 1, B. Geo 2, C. Geo 3, and D. Geo 4.

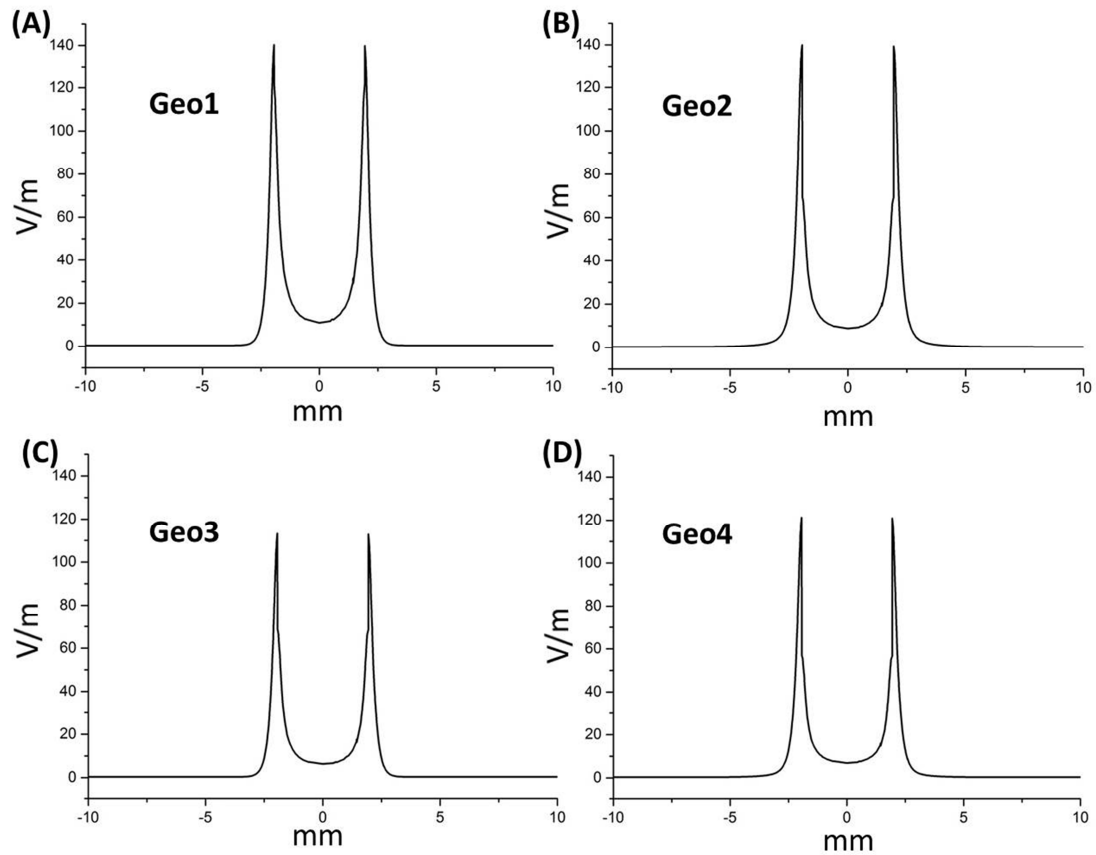

Supplement: f1 [file 5289041.f1.pdf]
